# Supplementary material
Source: MDPI journal article supplement (https://www.mdpi.com/2077-0472/14/3/400)
Supplement: s1 [file s1]

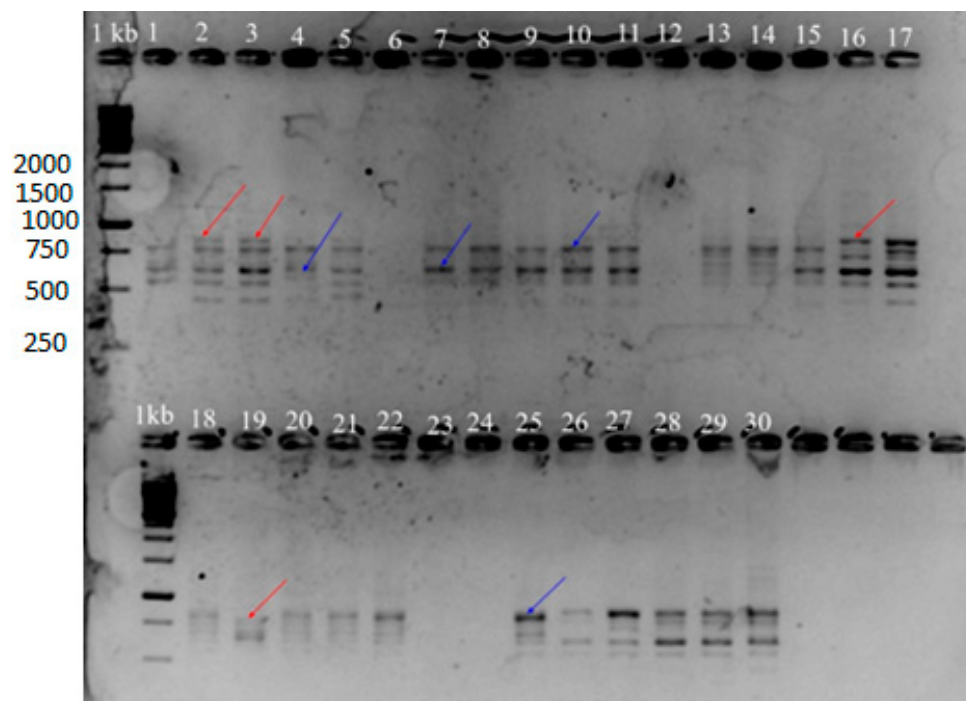

**Figure S1:** Banding pattern of PCR products of 30 mulberry accessions detailed in Table 1 using 2230 iPBS primers. Well 1 includes a 1 kb size DNA ladder; red-colored arrows point to polymorphic bands, while the blue arrows point to monomorphic bands.
